# Supplementary material for: Characterization of a Compound Heterozygous SLC2A9 Mutation That Causes Hypouricemia
Source: MDPI journal article supplement (doi:10.3390/biomedicines9091172), 2021-09-06

Supplementary Table S1. Possible variants identified in 6 individuals with hypouricemia by WES.

Abbreviations are as follows: Chr, chromosome; Bn, benign; Condel, consensus deleteriousness score of non-synonymous single nucleotide variants; Dam, damaging; DC, disease causing; Del, deleterious; Neu, neutral; PM, polymorphism; PP2, PolyPhen-2 prediction score Humvar; SIFT, sorting Intolerant from Tolerant; SNP, single nucleotide polymorphism; Tol, tolerant.

<sup>a</sup>cDNA mutations are numbered according to human cDNA reference sequence NM\_144585.2 (*URATI*), NM\_001001290.1 (*GLUT9*). <sup>b</sup>dbSNP database (<http://www.ncbi.nlm.nih.gov/SNP>). <sup>c</sup>gnomAD browser (<http://gnomad.broadinstitute.org/>). <sup>e</sup>Mutation taster (<http://www.mutationtaster.org/>). <sup>f</sup>PolyPhen-2 prediction score HumVar ranges from 0 to 1.0; 0 = benign, 1.0 = probably damaging (<http://genetics.bwh.harvard.edu/pph2/>). <sup>g</sup>SIFT (<http://sift.jcvi.org/>). <sup>h</sup>Condel (<http://bbglab.irbbarcelona.org/fannsdb/>). <sup>i</sup>CADD (<http://cadd.gs.washington.edu/>).

| Individual    | Gene Symbol   | Mutation Type | Chr | Base position | Nucleotide change <sup>a</sup> | Amino acid change    | Amino acid Conservation |       |     |          | Frequency in the dbSNP database <sup>b</sup>                                                    | Frequency in the gnomAD database <sup>c</sup> | Mutation Taster <sup>e</sup> | PP2 Humvar <sup>f</sup> | SIFT <sup>g</sup> | Condel <sup>h</sup> |
|---------------|---------------|---------------|-----|---------------|--------------------------------|----------------------|-------------------------|-------|-----|----------|-------------------------------------------------------------------------------------------------|-----------------------------------------------|------------------------------|-------------------------|-------------------|---------------------|
|               |               |               |     |               |                                |                      | Rhesus                  | Mouse | Dog | Elephant |                                                                                                 |                                               |                              |                         |                   |                     |
| NIH17A8004492 | <i>HMCN1</i>  | Comp Het      | 1   | 186043907     | c.8174C>T                      | p.Ala2725Val         | Ala                     | Ala   | Ala | Ala      | rs139140123<br>0.00005/5 (ExAC)<br>0.00008/1 (GO-ESP)                                           | 0.000044<br>(no hom)                          | DC                           | Dam<br>(0.636)          | Del<br>(0.02)     | Del<br>(0.606)      |
|               |               |               | 1   | 186057881     | c.9721A>G                      | p.Ile3241Val         | Ile                     | Ile   | Ile | Ile      | rs138928800<br>0.0010/120 (ExAC)<br>0.0016/8 (1000G)<br>0.0002/2 (GO=ESP)<br>0.0001/3 (TOPMED)  | 0.001162<br>(no hom)                          | DC                           | Bn<br>(0.326)           | Tol<br>(1)        | Neu<br>(0.102)      |
|               | <i>FAT4</i>   | Comp Het      | 4   | 126238958     | c.1392T>A                      | p.Phe464Leu          | Phe                     | Phe   | Phe | Phe      | rs767391145<br>0.000008/1 (ExAC)                                                                | 0.000008<br>(no hom)                          | DC                           | Dam<br>(0.989)          | Tol<br>(0.49)     | Neu<br>(0.450)      |
|               |               |               | 4   | 126371027     | c.8856A>G                      | p.Ile2952Met         | Ile                     | Ile   | Ile | Ile      | rs770138735<br>0.000008/1 (ExAC)                                                                | 0.000016<br>(no hom)                          | DC                           | Dam<br>(0.999)          | Del<br>(0.02)     | Del<br>(0.873)      |
|               | <i>ZNF143</i> | Comp Het      | 11  | 9495485       | c.206-3T>C                     | Splice site mutation |                         |       |     |          | rs749661663<br>0.00002/2 (ExAC)                                                                 | 0.000008<br>(no hom)                          | -                            | -                       | -                 | -                   |
|               |               |               | 11  | 9546800       | c.1700C>G                      | p.Ala567Gly          | Ala                     | Ala   | Ala | Ala      | rs77240493<br>0.0001/15 (ExAC)<br>0.0006/3 (1000G)                                              | 0.000097<br>(no hom)                          | DC                           | Dam<br>(0.935)          | Del<br>(0)        | Del<br>(0.825)      |
|               | <i>PPP6R3</i> | Comp Het      | 11  | 68321729      | c.731+4T>C                     | Splice site mutation |                         |       |     |          | rs766092322<br>0.000009/1 (ExAC)                                                                | 0.000004<br>(no hom)                          | -                            | -                       | -                 | -                   |
|               |               |               | 11  | 68367943      | c.2173G>C                      | p.Glu725Gln          | Glu                     | Glu   | Glu | Glu      | rs2298702<br>0.0013/161 (ExAC)<br>0.0028/14 (1000G)<br>0.00007/2 (TOPMED)                       | 0.001307<br>(4 hom)                           | DC                           | Bn<br>(0.015)           | Tol<br>(0.06)     | Neu<br>(0.323)      |
|               | <i>CEP152</i> | Comp Het      | 15  | 49033797      | c.4093+1G>T                    | Splice site mutation |                         |       |     |          | rs137967275<br>0.00009/11 (ExAC)<br>0.0002/1 (1000G)                                            | 0.000119<br>(no hom)                          | -                            | -                       | -                 | -                   |
|               |               |               | 15  | 49048668      | c.2777A>T                      | p.Glu926Val          | Glu                     | Glu   | Glu | Glu      | rs117557829<br>0.0006/75 (ExAC)<br>0.0010/5 (1000G)                                             | 0.000548<br>(1 hom)                           | PM                           | Dam<br>(0.915)          | Del<br>(0.01)     | Del<br>(0.811)      |
|               | <i>MYH8</i>   | Comp Het      | 17  | 10302192      | c.3874C>T                      | p.Arg1292*           | Arg                     | Arg   | Arg | Arg      | rs150008607<br>0.0006/72 (ExAC)<br>0.0014/7 (1000G)<br>0.00007/2 (TOPMED)                       | 0.000666<br>(1 hom)                           | DC                           | -                       | -                 | -                   |
|               |               |               | 17  | 10310061      | c.2117G>A                      | p.Arg706His          | Arg                     | Arg   | Arg | Arg      | rs150351713<br>0.0005.65 (ExAC)<br>0.0012/6 (1000G)<br>0.00003/1 (TOPMED)                       | 0.000631<br>(1 hom)                           | DC                           | Dam<br>(0.936)          | Del<br>(0.01)     | Del<br>(0.787)      |
|               | <i>ASB12</i>  | Hemi          | X   | 63445298      | c.233G>A                       | p.Arg78His           |                         |       |     |          | rs145118752<br>0.0002/13 (ExAC)<br>0.0011/4 (1000G)<br>0.00009/1 (GO-ESP)<br>0.00003/1 (TOPMED) | 0.000177<br>(no hom, 9 hemi)                  | DC                           | Bn<br>(0.071)           | Tol<br>(0.13)     | Neu<br>(0.258)      |
|               | <i>RLIM</i>   | Hemi          | X   | 73812633      | c.518C>G                       | p.Gln173Glu          | Gln                     | Gln   | Gln | Gln      | rs186217955<br>0.0003/27 (ExAC)<br>0.0011/4 (1000G)                                             | 0.000280<br>(no hom, 22 hemi)                 | DC                           | Bn<br>(0.084)           | Tol<br>(0.11)     | Neu<br>(0.278)      |
|               | <i>GPRI01</i> | Hemi          | X   | 136112845     | c.989A>C                       | p.Asn330Thr          | Asn                     | Ser   | Ser | Asn      | No                                                                                              | 0.000017<br>(no hom, 1 hemi)                  | PM                           | Bn<br>(0.015)           | Tol<br>(0.19)     | Neu<br>(0.050)      |
| NIH17A8239849 | <i>NEB</i>    | Comp Het      | 2   | 152408302     | c.19894A>G                     | p.Lys6632Glu         | Lys                     | Lys   | Lys | Lys      | rs765189771<br>0.00004/5 (ExAC)                                                                 | 0.000020<br>(no hom)                          | PM                           | Dam<br>(0.627)          | Tol<br>(0.19)     | Neu<br>(0.268)      |
|               |               |               | 2   | 152427081     | c.17048C>G                     | p.Ala5683Gly         | Ala                     | Met   | Met | Met      | No                                                                                              | No                                            | PM                           | Dam<br>(0.795)          | Tol<br>(0.47)     | Neu<br>(0.309)      |
|               |               |               | 2   | 152550904     | c.1829G>A                      | p.Gly610Glu          | Gly                     | Gly   | Gly | Gly      | rs139125293<br>0.00003/4 (ExAC)<br>0.0002/1 (1000G)                                             | 0.000043<br>(no hom)                          | DC                           | Dam<br>(1)              | Del<br>(0.02)     | Del<br>(0.883)      |
|               | <i>BAIAP3</i> | Comp Het      | 16  | 1388653       | c.208G>A                       | p.Asp70Asn           | Asp                     |       | Asp | Asp      | rs775509338<br>0.00004/2 (ExAC)                                                                 | 0.000032<br>(no hom)                          | PM                           | Bn<br>(0.001)           | Tol<br>(0.1)      | Neu<br>(0.286)      |

|               |          |             |    |                       |                   |              |     |     |     |     |                                                                                                 |                      |    |                |               |                |
|---------------|----------|-------------|----|-----------------------|-------------------|--------------|-----|-----|-----|-----|-------------------------------------------------------------------------------------------------|----------------------|----|----------------|---------------|----------------|
|               |          |             | 16 | 1394080               | c.1549C>T         | p.Arg517Cys  | Arg | Arg | Gly | His | rs762484237<br>0.00002/2 (ExAC)                                                                 | 0.000012<br>(no hom) | DC | Dam<br>(0.528) | Tol<br>(0.06) | Del<br>(0.500) |
| NIH17A8738324 | ATP8B2   | Hom         | 1  | 154321382             | c.3460C>T         | p.Arg1154Cys | Arg | Arg | Arg | Arg | rs41308375<br>0.0039/441 (ExAC)<br>0.0034/17 (1000G)<br>0.0005/7 (GO-ESP)<br>0.0002/7 (TOPMED)  | 0.003771<br>(9 hom)  | DC | Dam<br>(0.987) | Del<br>(0)    | Del<br>(0.881) |
|               | UGT2A3   | Comp<br>Het | 4  | 69796345              | c.1223G>A         | p.Gly408Glu  | Gly |     |     |     | rs139309909<br>0.0006/71 (ExAC)<br>0.0030/15 (1000G)<br>0.00003/1 (TOPMED)                      | 0.000633<br>(1 hom)  | DC | Dam<br>(1)     | Del<br>(0.02) | Del<br>(0.883) |
|               |          |             | 4  | 63796934              | c.1023delA        | p.Lys341fs   | Lys |     |     |     | rs147333514<br>0.0002/2 (GO-ESP)<br>0.0002/6 (TOPMED)                                           | 0.000032<br>(no hom) | -  | -              | -             | -              |
|               | HPGDS    | Comp<br>Het | 4  | 95220712              | c.519G>C          | p.Arg173Ser  | Arg | Lys | Arg | Arg | rs140417639<br>0.0003/42 (ExAC)<br>0.0012/6 (1000G)<br>0.00003/1 (TOPMED)                       | 0.000307<br>(no hom) | DC | Bn<br>(0.181)  | Tol<br>(0.18) | Neu<br>(0.073) |
|               |          |             | 4  | 95229787              | c.334A>G          | p.Lys112Glu  | Lys | Lys | Lys | Lys | rs150456822<br>0.0003/42 (ExAC)<br>0.0012/6 (1000G)<br>0.00003/1 (TOPMED)                       | 0.000307<br>(no hom) | DC | Dam<br>(0.994) | Del<br>(0)    | Del<br>(0.897) |
|               | ZFAT     | Comp<br>Het | 8  | 135614310             | c.1652C>A         | p.Ala551Asp  | Ala | Val | Ala | Ala | rs199682848<br>0.0001/15 (ExAC)<br>0.0006/3 (1000G)                                             | 0.000096<br>(no hom) | -  | -              | -             | -              |
|               |          |             | 8  | 135649769             | c.383C>T          | p.Thr128Met  | Thr | Thr | Pro | Thr | rs143917098<br>0.0001/15 (ExAC)<br>0.0010/5 (1000G)<br>0.00008/1 (GO-ESP)<br>0.00003/1 (TOPMED) | 0.000090<br>(no hom) | -  | -              | -             | -              |
|               | TNKS1BP1 | Comp<br>Het | 11 | 57068427              | c.5060C>T         | p.Ser1687Leu | Ser | Ser | Ser | Ser | rs554711702<br>0.0002/29 (ExAC)<br>0.0004/2 (1000G)                                             | 0.000209<br>(no hom) | DC | Dam<br>(0.998) | Del<br>(0)    | Del<br>(0.919) |
|               |          |             | 11 | 57077181-<br>57077183 | c.3002_3004delAGA | p.Lys1001del |     |     |     |     | rs747117006<br>0.0002/29 (ExAC)                                                                 | 0.000242<br>(no hom) | -  | -              | -             | -              |
|               | TMTC1    | Comp<br>Het | 12 | 29786124              | c.1084G>A         | p.Val362Ile  | Val | Val | Val | Val | rs150572401<br>0.0010/122 (ExAC)<br>0.0024/12 (1000G)<br>0.00003/1 (TOPMED)                     | 0.001026<br>(2 hom)  | PM | Bn<br>(0.018)  | Tol<br>(0.26) | Neu<br>(0.035) |
|               |          |             | 12 | 29936611              | c.74C>A           | p.Ala25Glu   |     | Val | Ala | Ala |                                                                                                 |                      | PM | Bn<br>(0.148)  | Tol<br>(0.18) | Neu<br>(0.069) |
|               | KRT35    | Comp<br>Het | 17 | 39635970              | c.535G>A          | p.Ala179Thr  | Ala | Ala | Ala | Ala | rs771101998<br>0.00003/4 (ExAC)                                                                 | 0.000032<br>(no hom) | DC | Dam<br>(0.633) | Del<br>(0.05) | Del<br>(0.567) |
|               |          |             | 17 | 39636961              | c.389G>A          | p.Arg130His  | Arg | Arg | Arg | Arg | rs185963879<br>0.0016/192 (ExAC)<br>0.0008/4 (1000G)<br>0.0003/4 (GO-ESP)<br>0.0003/9 (TOPMED)  | 0.001897<br>(2 hom)  | PM | Bn<br>(0.219)  | Del<br>(0.02) | Neu<br>(0.405) |
|               | SIGLEC11 | Comp<br>Het | 19 | 50461730              | c.1461G>C         | p.Trp487Cys  | Trp |     | Trp |     | rs751230929<br>0.000009/1 (ExAC)                                                                | 0.000004<br>(no hom) | DC | Dam<br>(1)     | Del<br>(0.01) | Del<br>(0.905) |
|               |          |             | 19 | 50461924              | c.1339G>T         | p.Val447Phe  | Val |     | Val |     | rs749024800<br>0.00006/7 (ExAC)<br>0.00003/1 (TOPMED)                                           | 0.000041<br>(no hom) | PM | Bn<br>(0.057)  | Del<br>(0.02) | Neu<br>(0.387) |
|               | CEP250   | Comp<br>Het | 20 | 34091694              | c.5497G>A         | p.Glu1833Lys | Glu | Glu | Glu | Glu | rs201724904<br>0.0003/31 (ExAC)<br>0.0002/1 (1000G)                                             | 0.000228<br>(no hom) | -  | -              | -             | -              |
|               |          |             | 20 | 34096811              | c.6946C>T         | p.Arg2316Cys | Arg | Arg | Arg | Arg | No                                                                                              | No                   | -  | -              | -             | -              |
|               | LAMA5    | Comp<br>Het | 20 | 60892479              | c.7433C>T         | p.Ala2478Val | Ala | Ala |     |     | rs144781761<br>0.0006/63 (ExAC)<br>0.0012/6 (1000G)                                             | 0.000468<br>(1 hom)  | PM | Bn<br>(0.082)  | Del<br>(0.05) | Neu<br>(0.351) |

|               |          |             |    |                     |                            |                      |     |     |     |                                        |                                                                           |                      |    |                |               |                |
|---------------|----------|-------------|----|---------------------|----------------------------|----------------------|-----|-----|-----|----------------------------------------|---------------------------------------------------------------------------|----------------------|----|----------------|---------------|----------------|
|               |          |             |    |                     |                            |                      |     |     |     | 0.0003/4 (GO-ESP)<br>0.0001/3 (TOPMED) |                                                                           |                      |    |                |               |                |
|               |          |             | 20 | 60911479            | c.2240G>A                  | p.Arg747Gln          | Arg | Arg | Arg | Arg                                    | rs201992387<br>0.00008/9 (ExAC)<br>0.0006/3 (1000G)                       | 0.000069<br>(no hom) | DC | Dam<br>(0.991) | Tol<br>(0.06) | Del<br>(0.766) |
| NIH1705180563 | FAT2     | Comp<br>Het | 5  | 150924212           | c.6476T>C                  | p.Val2159Ala         | Val | Val | Val | Val                                    | rs201382441<br>0.0002/26 (ExAC)<br>0.0008/4 (1000G)<br>0.00003/1 (TOPMED) | 0.000242<br>(no hom) | DC | Dam<br>(0.846) | Del<br>(0)    | Del<br>(0.770) |
|               |          |             | 5  | 150945824           | c.2669T>C                  | p.Ile890Thr          | Ile | Ile | Ile | Ile                                    | rs145215828<br>0.0003/31 (ExAC)<br>0.0008/4 (1000G)                       | 0.000211<br>(1 hom)  | PM | Bn<br>(0.186)  | Tol<br>(0.41) | Neu<br>(0.033) |
|               | SORBS3   | Comp<br>Het | 8  | 22422866            | c.902A>G                   | p.Lys301Arg          |     | Lys |     | Lys                                    | rs548045720<br>0.0002/4 (ExAC)<br>0.0006/3 (1000G)                        | 0.000136<br>(1 hom)  | DC | Bn<br>(0.04)   | Tol<br>(0.15) | Neu<br>(0.243) |
|               |          |             | 8  | 22426781            | c.1426C>T                  | p.Arg476Cys          | Arg | Arg | Arg | Arg                                    | rs540462491<br>0.0004/42 (ExAC)<br>0.0006/3 (1000G)                       | 0.000254<br>(no hom) | DC | Dam<br>(0.592) | Del<br>(0)    | Del<br>(0.649) |
|               | KRTAP5-8 | Hom         | 11 | 71249558            | c.457T>C                   | p.Cys153Ser          |     |     |     |                                        | No                                                                        | No                   | PM | Bn<br>(0.001)  | Del<br>(0.01) | Neu<br>(0.406) |
|               | CD163L1  | Comp<br>Het | 12 | 7521564-<br>7521567 | c.4040-6 4040-<br>3delTCTC | Splice site mutation |     |     |     |                                        | No                                                                        | No                   | -  | -              | -             | -              |
|               |          |             | 12 | 7551129             | c.1460G>A                  | p.Gly487Glu          | Gly | Gly | Gly | Gly                                    | rs141153568<br>0.00002/2 (ExAC)                                           | 0.000026<br>(no hom) | DC | Dam<br>(1)     | Del<br>(0)    | Del<br>(0.945) |
|               | OVCH1    | Comp<br>Het | 12 | 29598250            | c.2842G>A                  | p.Gly948Ser          | Gly |     | Gly |                                        | rs745853862<br>0.00002/3 (ExAC)                                           | 0.000033<br>(no hom) | -  | -              | -             | -              |
|               |          |             | 12 | 29614918            | c.2149C>T                  | p.Gln717*            | Gln |     | Gln | Gln                                    | No                                                                        | 0.000008<br>(no hom) | -  | -              | -             | -              |

|           |                  |             |    |                       |                           |                      |     |     |     |     |                                                                                                 |                      |    |                |               |                |
|-----------|------------------|-------------|----|-----------------------|---------------------------|----------------------|-----|-----|-----|-----|-------------------------------------------------------------------------------------------------|----------------------|----|----------------|---------------|----------------|
| YID182829 | <i>PIK3CB</i>    | Hom         | 3  | 138433432             | c.1180T>G                 | p.Leu394Val          | Leu | Leu | Leu | Leu | rs769366263<br>0.00002/2 (ExAC)                                                                 | 0.000014<br>(no hom) | DC | Dam<br>(0.874) | Tol<br>(0.08) | Del<br>(0.639) |
|           | <i>ASIC3</i>     | Hom         | 7  | 150748004             | c.973G>A                  | p.Ala325Thr          | Ala | Ala | Ala | Ala | rs571908824<br>0.00003/4 (ExAC)<br>0.0002/1 (1000G)                                             | 0.000026<br>(1 hom)  | PM | Bn<br>(0.014)  | Tol<br>(0.05) | Neu<br>(0.346) |
|           | <i>TAF1L</i>     | Comp<br>Het | 9  | 32631907              | c.3671T>C                 | p.Phe1224Ser         | Phe |     |     |     | rs761527217<br>0.00007/9 (ExAC)<br>0.00005/6 (TOPMED)                                           | 0.000087<br>(no hom) | DC | Dam<br>(0.54)  | Del<br>(0)    | Del<br>(0.627) |
|           |                  |             | 9  | 32635336              | c.242C>T                  | p.Thr81Met           | Thr |     |     |     | rs764175922<br>0.00007/9 (ExAC)<br>0.00006/7 (TOPMED)                                           | 0.000090<br>(no hom) | DC | Dam<br>(0.985) | Tol<br>(0.09) | Del<br>(0.728) |
|           | <i>ADAM8</i>     | Hom         | 10 | 135084732             | c.1346C>T                 | p.Ala449Val          | Ala | Ala | Ala | Ala | rs147448426<br>0.0005/50 (ExAC)<br>0.0008/4 (1000G)<br>0.0009/12 (GO-ESP)<br>0.0004/49 (TOPMED) | 0.000403<br>(no hom) | DC | Dam<br>(0.993) | Del<br>(0)    | Del<br>(0.895) |
|           | <i>NFE2L1</i>    | Comp<br>Het | 17 | 46136735              | c.2051G>A                 | p.Arg684His          | Arg | Arg | Arg | Arg | rs140314190<br>0.0002/21 (ExAC)<br>0.0005/6 (GO-ESP)<br>0.0002/30 (TOPMED)                      | 0.000148<br>(no hom) | DC | Dam<br>(0.899) | Tol<br>(0.14) | Del<br>(0.605) |
|           |                  |             | 17 | 46136777              | c.2093G>A                 | p.Arg698Gln          | Arg | Arg | Arg | Arg | rs182192213<br>0.00006/7 (ExAC)<br>0.0004/2 (1000G)<br>0.00003/4 (TOPMED)                       | 0.000033<br>(no hom) | DC | Dam<br>(0.758) | Del<br>(0.01) | Del<br>(0.686) |
|           | <i>RBM12</i>     | Hom         | 20 | 34242574-<br>34242582 | c.663_671delTCCTG<br>TGCC | p.Val223_Pro225del   |     |     |     |     | rs541533000<br>0.0004/2 (1000G)<br>0.00002/2 (TOPMED)                                           | 0.000477<br>(no hom) | -  | -              | -             | -              |
|           | <i>COL18A1</i>   | Comp<br>Het | 21 | 46912627              | c.2754C>T                 | Splice site mutation |     |     |     |     | rs199910738<br>0.0002/18 (ExAC)<br>0.0002/1 (1000G)<br>0.00007/9 (TOPMED)                       | 0.000158<br>(no hom) | -  | -              | -             | -              |
|           |                  |             | 21 | 46927475              | c.3757C>T                 | Splice site mutation |     |     |     |     | rs756868239<br>0.000009/1 (ExAC)                                                                | 0.000012<br>(no hom) | -  | -              | -             | -              |
| YID632847 | <i>PPEF1</i>     | Hemi        | X  | 18845519              | c.1876A>G                 | p.Ile626Val          | Ile | Ile | Ile | Ile | rs2239435<br>0.0002/21 (ExAC)<br>0.0003/1 (1000G)<br>0.0002/19 (TOPMED)                         | 0.000180<br>(no hom) | DC | Dam<br>(0.994) | Tol<br>(0.08) | Del<br>(0.752) |
|           | <i>ASB12</i>     | Hemi        | X  | 63445298              | c.233G>A                  | p.Arg78His           |     |     |     |     | rs145118752<br>0.0002/13 (ExAC)<br>0.0011/4 (1000G)<br>0.00009/1 (GO-ESP)<br>0.0001/13 (TOPMED) | 0.000177<br>(no hom) | DC | Bn<br>(0.071)  | Tol<br>(0.13) | Neu<br>(0.258) |
|           | <i>PRDM16</i>    | Comp<br>Het | 1  | 3102863               | c.212C>T                  | p.Pro71Leu           |     |     |     |     |                                                                                                 |                      | DC | Dam<br>(0.997) | Del<br>(0)    | Del<br>(0.911) |
|           |                  |             | 1  | 3347441               | c.3290A>G                 | p.Asp1097Gly         | Glu | Glu | Glu | Glu | rs777907752<br>0.000008/1 (ExAC)<br>0.00002/3 (TOPMED)                                          | 0.000018<br>(no hom) | DC | Bn<br>(0)      | Tol<br>(0.23) | Neu<br>(0.042) |
|           | <i>SYNE1</i>     | Hom         | 6  | 152553246             | c.20862+5T>C              | Splice site mutation |     |     |     |     | rs753177718<br>0.000008/1 (ExAC)<br>0.00002/3 (TOPMED)                                          | 0.000008<br>(no hom) | -  | -              | -             | -              |
|           | <i>PWWP2B</i>    | Hom         | 10 | 134218351             | c.347C>T                  | p.Pro116Leu          |     | Pro |     | Pro | rs750405972<br>0.0002/14 (ExAC)<br>0.000008/1 (TOPMED)                                          | 0.000090<br>(no hom) | DC | Dam<br>(0.9)   | Tol<br>(0.08) | Del<br>(0.656) |
|           | <i>ARHGAP11A</i> | Comp<br>Het | 15 | 32929165              | c.2191G>T                 | p.Asp731Tyr          | Val | Asn | Asp | Asp | rs757140912<br>0.00002/2 (ExAC)                                                                 | 0.000012<br>(no hom) | PM | Bn<br>(0.054)  | Tol<br>(0.07) | Neu<br>(0.323) |
|           |                  |             | 15 | 32929478              | c.2504G>A                 | p.Arg835His          | Arg | Arg | Arg | Arg | rs774973189<br>0.0001/18 (ExAC)<br>0.0001/13 (TOPMED)                                           | 0.000188<br>(no hom) | DC | Dam<br>(0.996) | Del<br>(0)    | Del<br>(0.906) |
|           | <i>SULT1A2</i>   | Hom         | 16 | 28604638              | c.529C>T                  | p.Gln177*            | Gln | Lys | Gln | Gln | rs779420691<br>0.00002/2 (ExAC)                                                                 | 0.000024<br>(no hom) | DC | -              | -             | -              |

Supplementary Table S2. Predicted functional impacts of amino acid changes of *SLC2A9b*

| Mutation | Func. Impact | Assigned Effect | Inversion Barrier | RMSD (Overall) | $\Delta$ RMSF |
|----------|--------------|-----------------|-------------------|----------------|---------------|
| WT       |              |                 | 3.0               |                |               |
| M126V    | Medium       | Structure       | >10.0             | 7.9            | 7.9           |
| R351W    | High         | Structure       | >10.0             | 6.4            | 6.4           |

Effects of mutations based on molecular dynamics trajectory analysis. RMSD (Overall) is the mean displacement of the residue measured against the initial, refined wild-type model. RMSD (Local) is the change measured against the 12Å region around the residue T:Thr, M:Met, V:Val, R: Arg, W:Trp

Supplementary Table S3. Variant filtering process or unsolved cases

| <b>Individual</b> | <b>Total<br/>sequence<br/>reads</b> | <b>Matched<br/>reads</b> | <b>Total<br/>number of<br/>variants<br/>detected</b> | <b>Variants<br/>with<br/>MAF<br/>&lt;1%<br/>(dbSNP)</b> | <b>Variants<br/>filtered<br/>by<br/>46<br/>control</b> | <b>Non-<br/>synonymous<br/>and<br/>splice site<br/>variants</b> | <b>Located<br/>within<br/>splice<br/>sites</b> | <b>Stop<br/>codon<br/>gained or<br/>lost</b> | <b>Insertion<br/>or<br/>Deletion</b> | <b>Missense</b> |
|-------------------|-------------------------------------|--------------------------|------------------------------------------------------|---------------------------------------------------------|--------------------------------------------------------|-----------------------------------------------------------------|------------------------------------------------|----------------------------------------------|--------------------------------------|-----------------|
| NIH17A800<br>4492 | 64,404,038                          | 63,765,823<br>(99.0%)    | 152,116                                              | 30,685                                                  | 18,940                                                 | 1,412                                                           | 102                                            | 22                                           | 113                                  | 1,175           |
| NIH17A823<br>9849 | 68,750,852                          | 68,019,481<br>(98.9%)    | 156,924                                              | 32,110                                                  | 19,964                                                 | 1,455                                                           | 104                                            | 25                                           | 126                                  | 1,200           |
| NIH17A856<br>8242 | 64,956,500                          | 64,301,552<br>(99.0%)    | 155,946                                              | 32,088                                                  | 19,949                                                 | 1,422                                                           | 105                                            | 24                                           | 129                                  | 1,164           |
| NIH17A873<br>8324 | 69,795,198                          | 69,020,373<br>(98.9%)    | 159,037                                              | 33,273                                                  | 20,793                                                 | 1,438                                                           | 96                                             | 31                                           | 111                                  | 1,200           |
| NIH170518<br>0563 | 68,013,252                          | 67,232,710<br>(98.9%)    | 157,342                                              | 32,234                                                  | 20,184                                                 | 1,555                                                           | 146                                            | 17                                           | 122                                  | 1,270           |
| YID182829         | 62,413,708                          | 62,114,408<br>(99.5%)    | 131,680                                              | 20,049                                                  | 10,892                                                 | 1,058                                                           | 102                                            | 12                                           | 72                                   | 872             |
| YID632847         | 62,429,460                          | 62,141,319<br>(99.5%)    | 132,642                                              | 20,390                                                  | 11,066                                                 | 1,110                                                           | 136                                            | 17                                           | 69                                   | 888             |

Supplementary Table S4. Primer information for rs369512758 (*SLC2A9*)

|                |             |         |                      |
|----------------|-------------|---------|----------------------|
| <i>SLC2A9b</i> | p.Met126Val | Forward | CCACAGGACTGTCCCACTTT |
|                |             | Reverse | TCAGTGACATGCCTCATGGT |



Supplementary Figure S1. Sanger confirmation of the novel variant p.M126V of *SLC2A9b*

c.376G>A:p.M126V

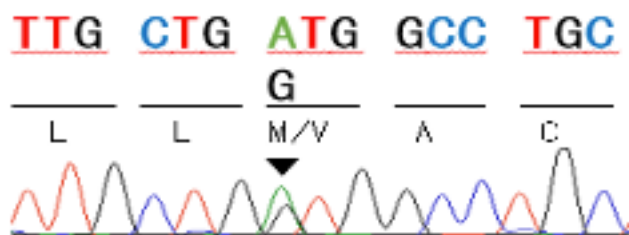

Supplement: s1 [file s1]
